# Supplementary material
Source: Springer Nature journal article supplement (https://www.springermedizin.de/resource/supplementary/13012_2008_133_MOESM1_ESM.pdf/9629328)

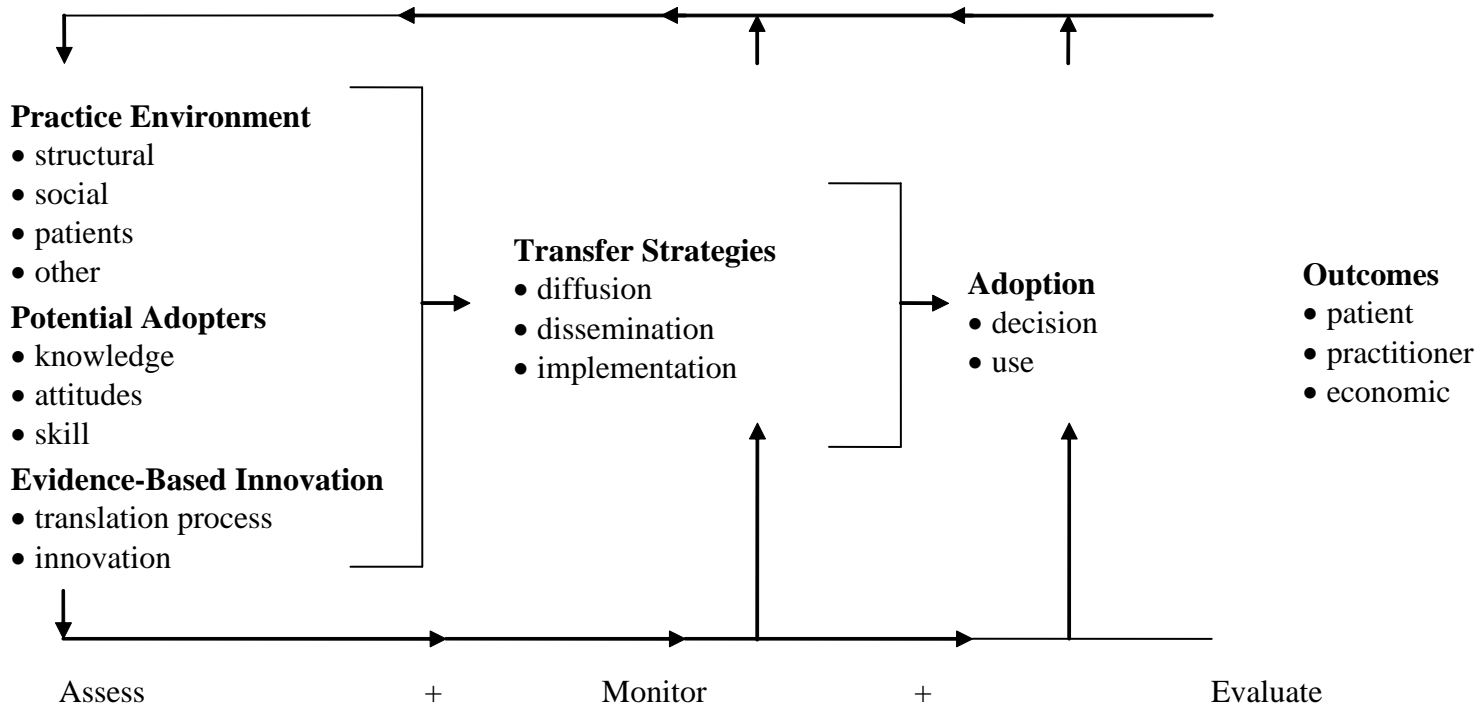

Supplement: MOESM1 [file 9629328]
